# Supplementary material for: SARS-CoV-2 ORF6 Disrupts Bidirectional Nucleocytoplasmic Transport through Interactions with Rae1 and Nup98
Source: PubMed Central journal article supplement (PMC8092196; doi:10.1128/mbio.00065-21), 2021-04-13
Supplement: mBio.00065-21-sf001.pdf [file mBio.00065-21-sf001.pdf]

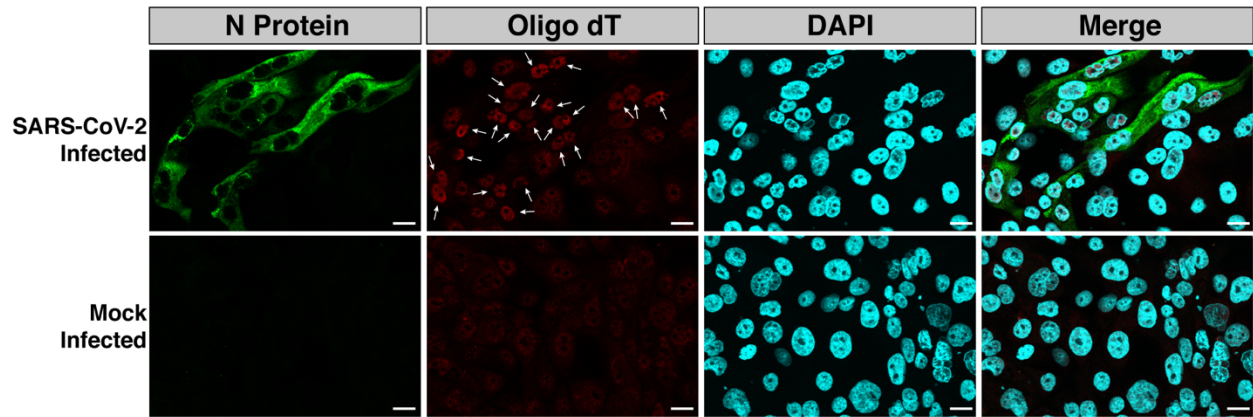

**Figure S1.** Poly-A mRNA staining of Calu3 cells infected with SARS-CoV-2 revealed nuclear localization of mRNA in infected cells (highlighted with white arrows). Scale bar: 20  $\mu$ m.
