# Supplementary material for: SARS-CoV-2 ORF6 Disrupts Bidirectional Nucleocytoplasmic Transport through Interactions with Rae1 and Nup98
Source: PubMed Central journal article supplement (PMC8092196; doi:10.1128/mbio.00065-21), 2021-04-13
Supplement: mBio.00065-21-sf002.pdf [file mBio.00065-21-sf002.pdf]

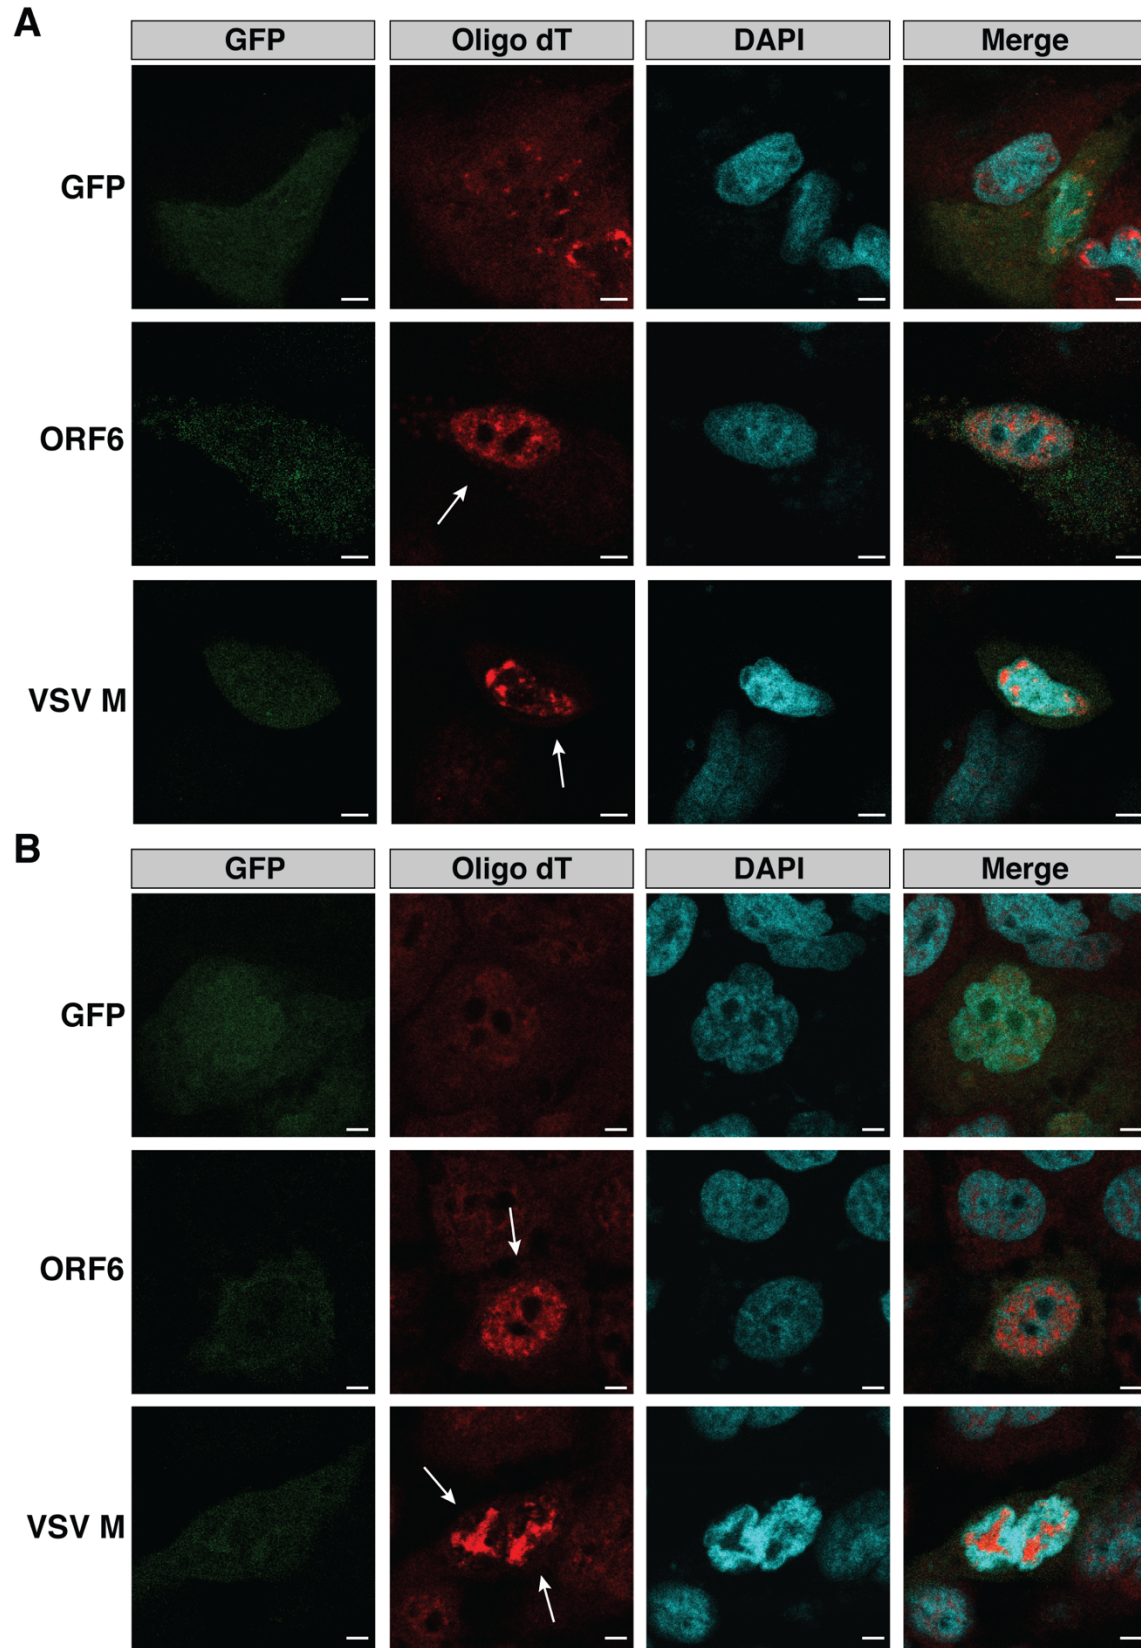

**Figure S2.** A) A549 and B) Calu3 cells were transiently transfected with GFP, GFP-SARS-CoV-2 ORF6, or GFP-VSV M. Staining for poly-A mRNA revealed cells expressing SARS-CoV-2 ORF6 and VSV M accumulated mRNA in the nuclei. White arrows depict cells transfected with SARS-CoV-2 ORF6 or VSV M. Scale bar: 5  $\mu$ m.
