# Supplementary material for: SARS-CoV-2 ORF6 Disrupts Bidirectional Nucleocytoplasmic Transport through Interactions with Rae1 and Nup98
Source: PubMed Central journal article supplement (PMC8092196; doi:10.1128/mbio.00065-21), 2021-04-13
Supplement: mBio.00065-21-sf003.pdf [file mBio.00065-21-sf003.pdf]

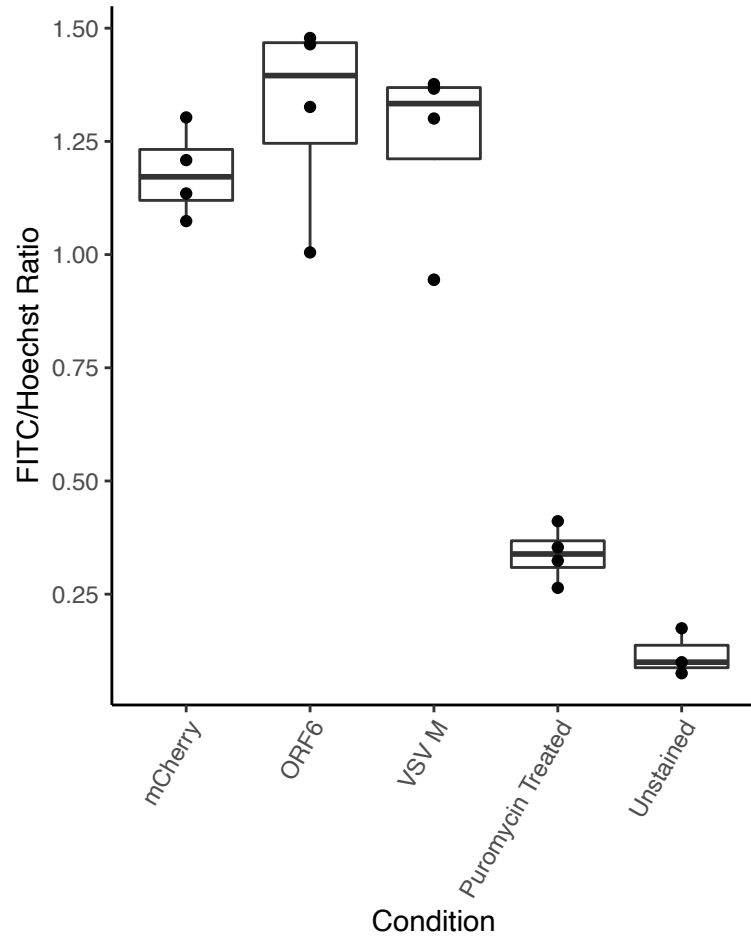

**Figure S3.** Nascent protein synthesis was measured in cells transfected with mCherry, SARS-CoV-2 ORF6, or VSV M and puromycin treated cells using the Click-iT AHA Alexa Fluor 488 Protein Synthesis HCS Assay. Similar levels of nascent protein synthesis were observed in mCherry, SARS-CoV-2 ORF6, and VSV M-expressing cells.
