# Supplementary material for: SARS-CoV-2 ORF6 Disrupts Bidirectional Nucleocytoplasmic Transport through Interactions with Rae1 and Nup98
Source: PubMed Central journal article supplement (PMC8092196; doi:10.1128/mbio.00065-21), 2021-04-13
Supplement: mBio.00065-21-sf005.pdf [file mBio.00065-21-sf005.pdf]

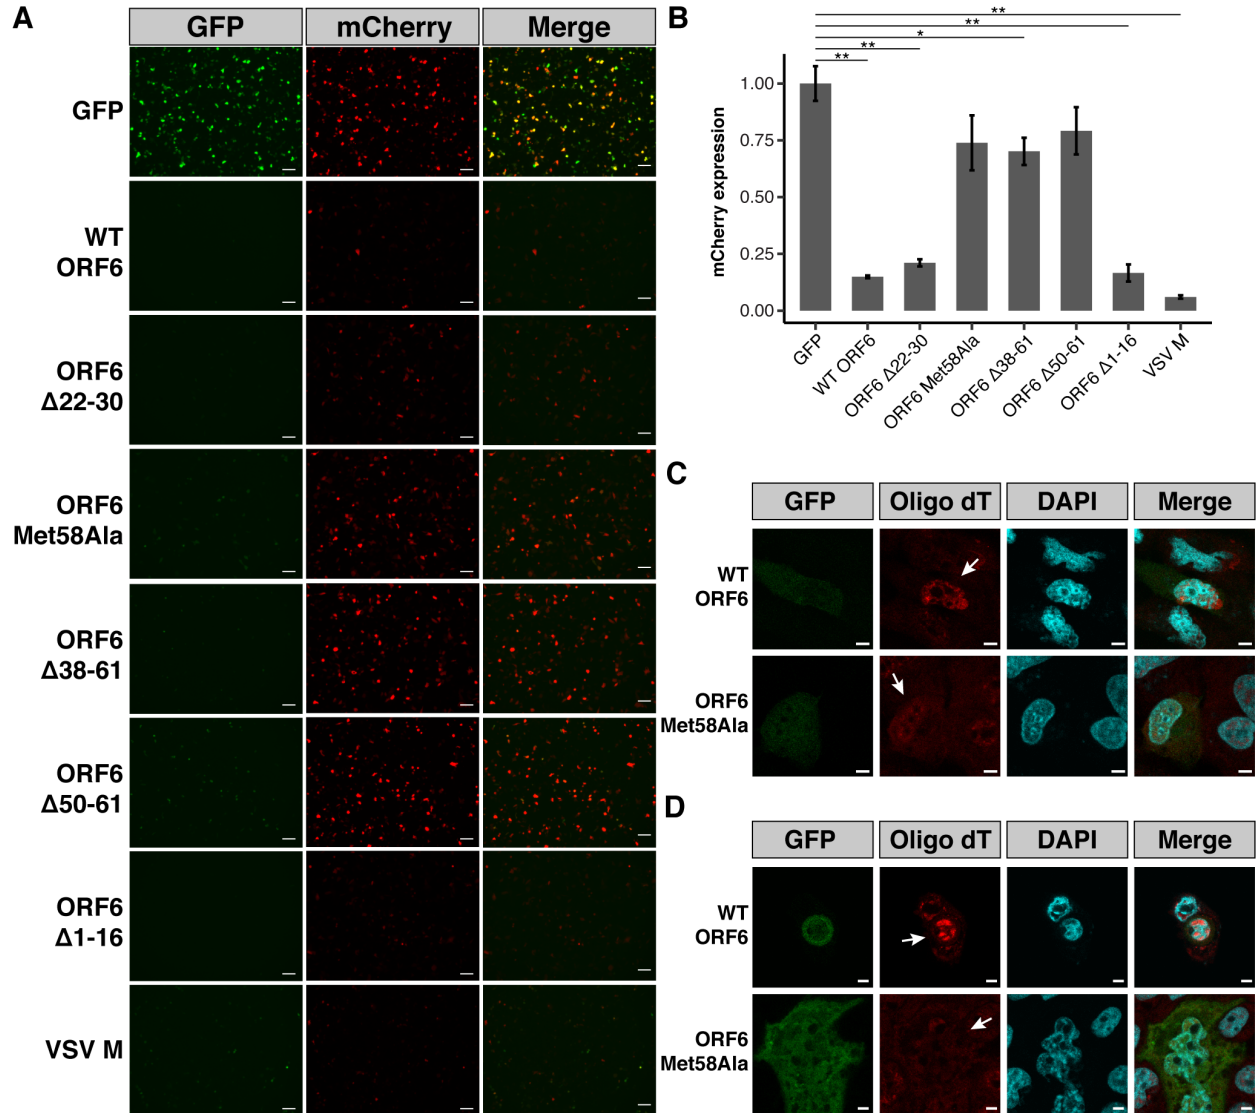

**Figure S5.** A) A549 cells were transiently transfected with GFP-tagged constructs and mCherry. Cells were visualized 24 hours after transfection and all images were taken with identical fluorescence gain settings. Scale bar: 100  $\mu$ m. B) Fluorescent intensities across 3 fields per conditions were measured with ImageJ and displayed as mean  $\pm$  standard error. Staining for poly-A mRNA in C) A549 and D) Calu3 cells revealed SARS-CoV-2 ORF6 Met58Ala-expressing cells do not accumulate mRNA in the nuclei, consistent with the results of the mCherry co-transfection assay. White arrows indicate transfected cells. Scale bar: 5  $\mu$ m. \*  $p < 0.05$ ; \*\*  $p < 0.01$ .
