# Supplementary material for: SARS-CoV-2 ORF6 Disrupts Bidirectional Nucleocytoplasmic Transport through Interactions with Rae1 and Nup98
Source: PubMed Central journal article supplement (PMC8092196; doi:10.1128/mbio.00065-21), 2021-04-13
Supplement: mBio.00065-21-sf006.pdf [file mBio.00065-21-sf006.pdf]

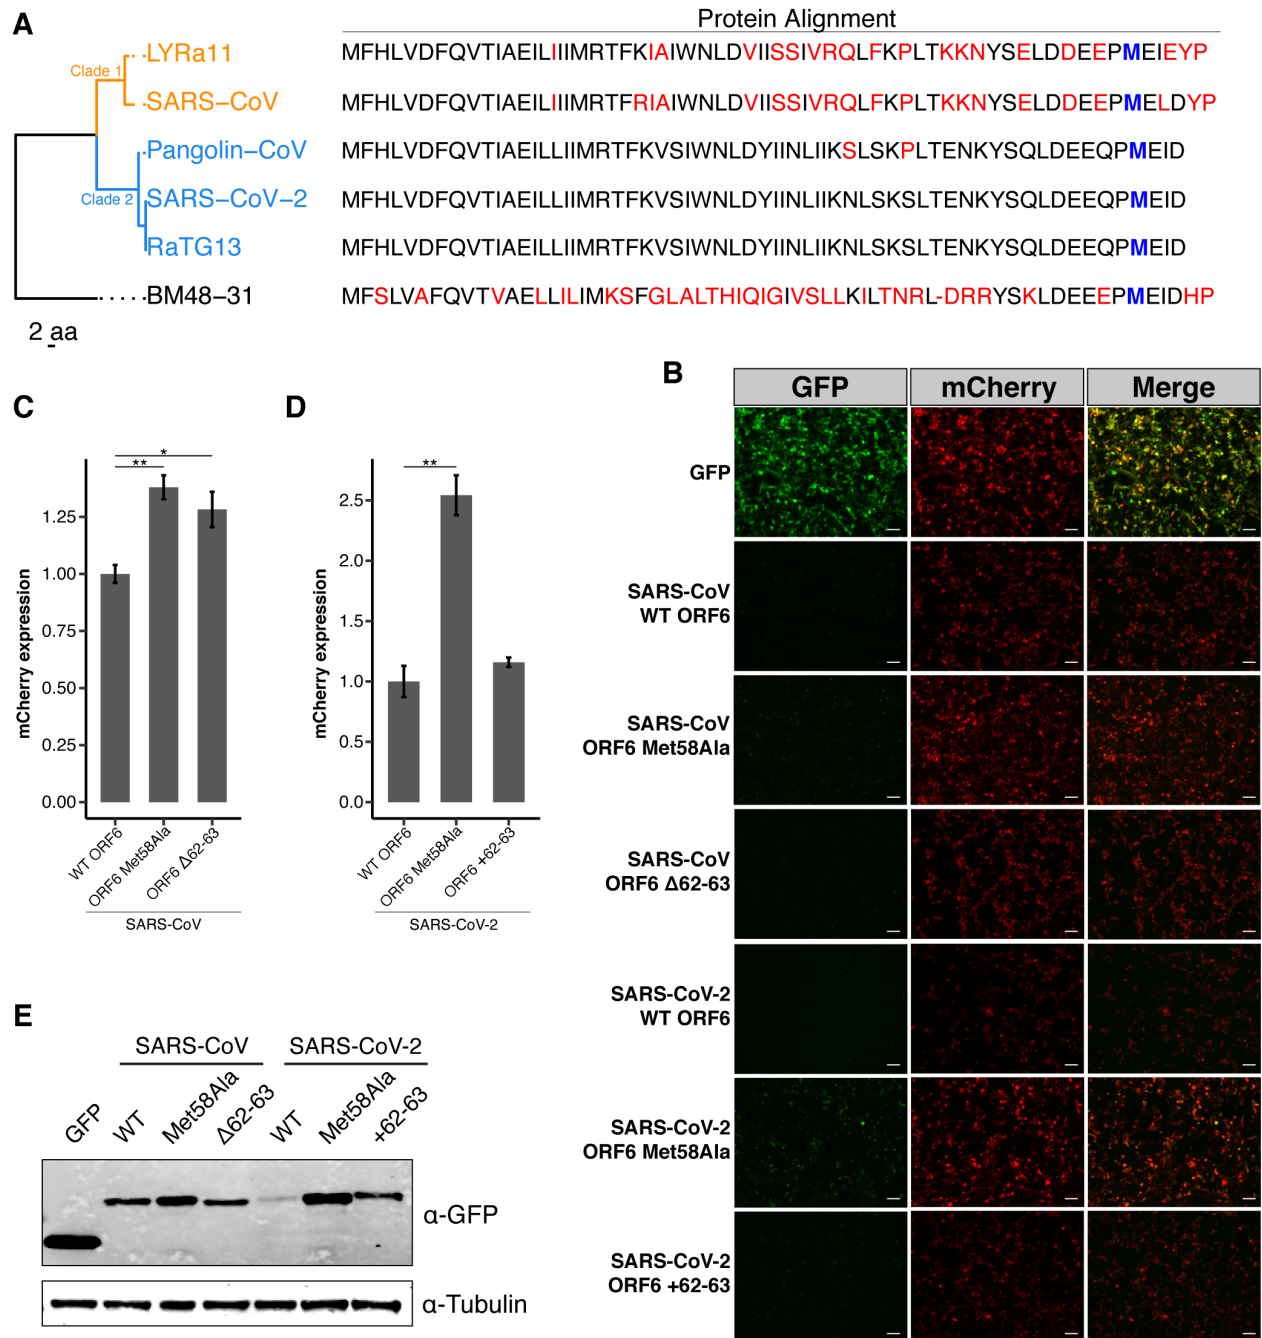

**Figure S6.** A) An analysis of the ORF6 homologs in the related zoonotic sarbecoviruses, LYRa11 (KF569996.1), Pangolin-CoV (EPI\_ISL\_410721), and RaTG13 (MN996532.2), reveals the ORF6 protein in the Clade 1 sarbecoviruses is 2 amino acid longer than that in the Clade 2 sarbecoviruses. The Clade 3 sarbecovirus BM48-31 (NC\_014470.1) was used as an outgroup in the phylogenetic analysis. Residues different from SARS-CoV-2 ORF6 are colored red while the conserved methionine residue is colored blue. B) 293T cells were transiently transfected with GFP-tagged constructs and mCherry. Expression was visualized 48 hours after transfection and fluorescent intensities across 3 fields per experimental condition were measured for C)

SARS-CoV ORF6 constructs and D) SARS-CoV-2 ORF6 constructs. Scale bar: 100  $\mu$ m.  
\*  $p < 0.05$ ; \*\*  $p < 0.01$ . E) Expression levels of the GFP-tagged SARS-CoV and SARS-CoV-2 ORF6 constructs were visualized by western blotting.
